# Supplementary material for: Patients' preferred and perceived level of involvement in decision making for cancer treatment: A systematic review
Source: PubMed Central journal article supplement — Psychooncology. 2021 Jun 28;30(10):1663–79. doi: 10.1002/pon.5750 (PMC8518833; doi:10.1002/pon.5750), 2021-06-28
Supplement: PON-30-1663-s001.pdf [file PON-30-1663-s001.pdf]

**Modified version New-Castle Ottawa scale for cross-sectional studies.**

**Selection of participants – max 5 stars**

*1. Clear description of the sample, including: cancer type, stage cancer, culture, age, decision setting*

- a) Clear description\*\*
- b) Somewhat clear description\*
- c) No clear description of the sample

*2. Representativeness of the sample:*

- a) Truly representative of the average in the target population. \* (all subjects or random sampling)
- b) Somewhat representative of the average in the target population. \* (non-random sampling)
- c) Selected group of users.
- d) No description of the sampling strategy.

*3. Sample size:*

- a) Justified and satisfactory. \*
- b) Not justified or not reported.

*4. Non-respondents:*

- a) Comparability between respondents and non-respondents characteristics is established, and the response rate is satisfactory. \*
- b) The response rate is unsatisfactory, and/ or the comparability between respondents and non-respondents is unsatisfactory.
- c) No description of the response rate, and/ or the characteristics of the responders and the non-responders.

**Definition and assessment of the outcome – max 4 stars**

*5. Clear variables: Clear description of the timing of the measurement preferred and perceived level of involvement*

- a) Both variables clearly defined including time period for measurement\*\*
- b) One or other variable clearly defined including time period for measurement \*
- c) Neither variable clearly defined including time period for measurement

6. *Assessment of the outcome:*

- a) Validated measurement tool. \*\*
- b) Non-validated measurement tool, but the tool is available or described.\*
- c) No description of the measurement tool.
