# Supplementary material for: Patients' preferred and perceived level of involvement in decision making for cancer treatment: A systematic review
Source: PubMed Central journal article supplement — Psychooncology. 2021 Jun 28;30(10):1663–79. doi: 10.1002/pon.5750 (PMC8518833; doi:10.1002/pon.5750), 2021-06-28

The percentage of patients preferring and perceiving an active, shared and passive role and the discordance presented for all individual studies. The dotted lines present the median of all studies for the percentage of the preferred, perceived and discordance. Studies are categorized for type of cancer: 1=breast cancer; 2=haematologic cancer; 3=lung cancer; 4=(colo)rectal cancer; 5=prostate cancer; 6=various cancer.

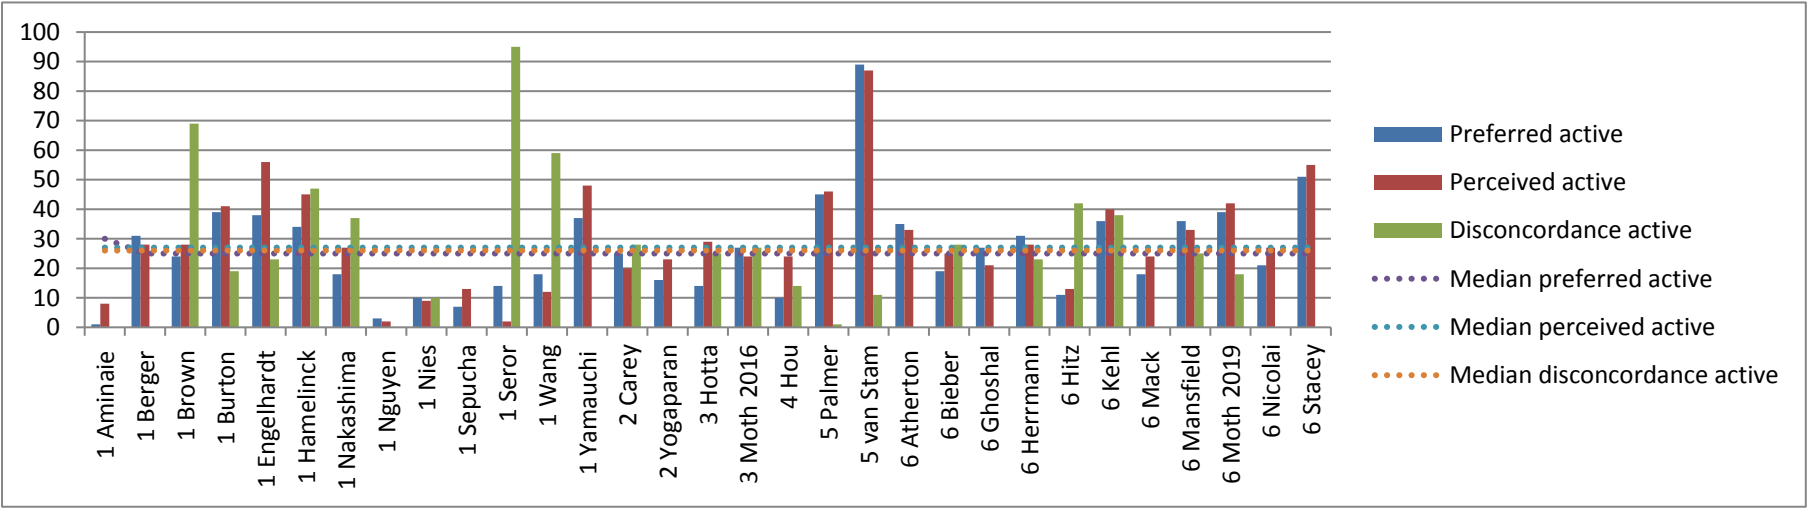

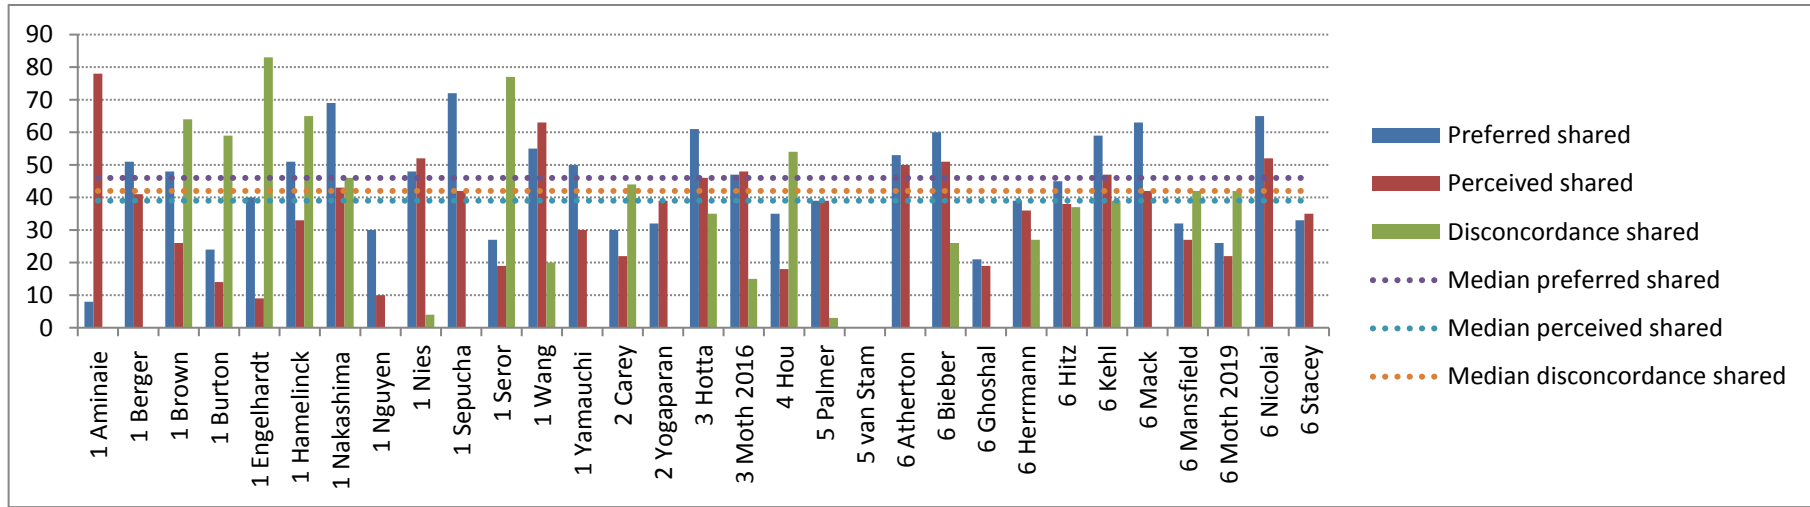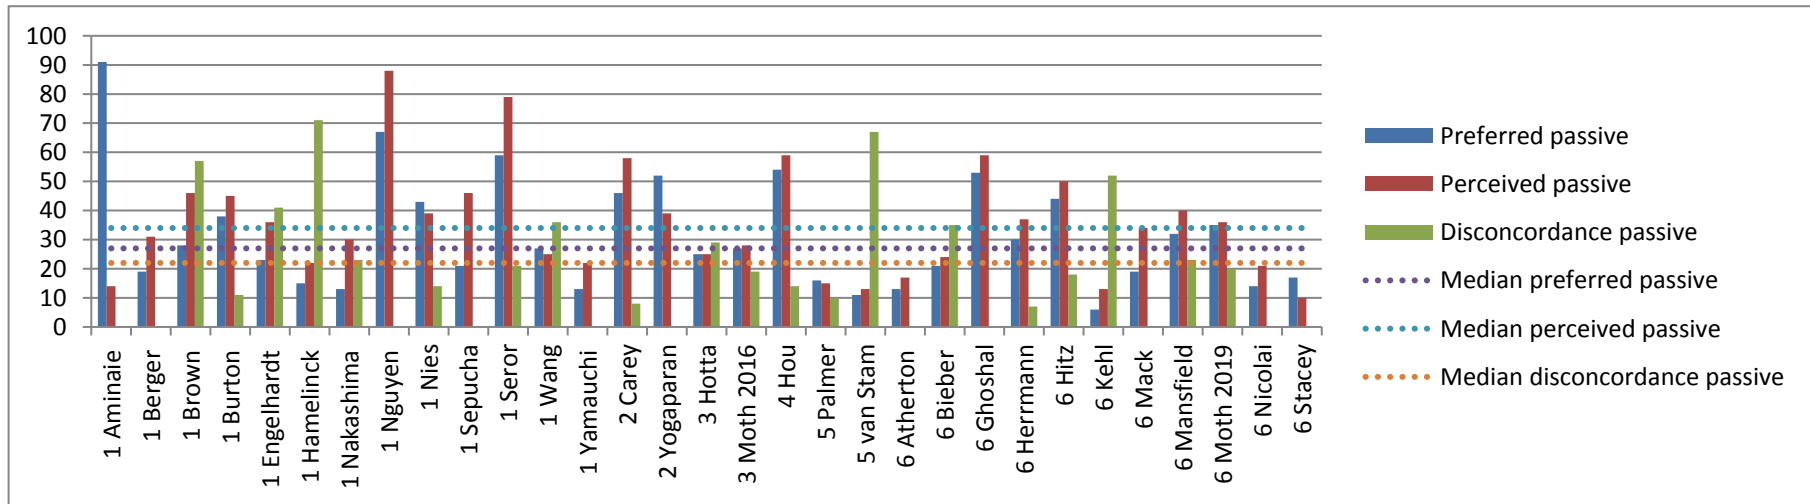

Supplement: PON-30-1663-s002.pdf [file PON-30-1663-s002.pdf]
