# Supplementary material for: Patients' preferred and perceived level of involvement in decision making for cancer treatment: A systematic review
Source: PubMed Central journal article supplement — Psychooncology. 2021 Jun 28;30(10):1663–79. doi: 10.1002/pon.5750 (PMC8518833; doi:10.1002/pon.5750), 2021-06-28
Supplement: PON-30-1663-s003.pdf [file PON-30-1663-s003.pdf]

Example of a table as presented in individual studies **that allow for** calculation of the (dis)concordance.

|                  | <b>Perceived</b> |          |          |       |
|------------------|------------------|----------|----------|-------|
| <b>Preferred</b> | Active           | Shared   | Passive  | Total |
| Active           | <b>A</b>         | E        | I        | M     |
| Shared           | B                | <b>F</b> | J        | N     |
| Passive          | C                | G        | <b>K</b> | O     |
| Total            | D                | H        | L        | P     |

For example the percentage discordance for a shared decision role is calculated by:  $(B + J) / N * 100\%$ . The overall discordance for the 3 levels together is calculated by:  $P - (A + F + K) / P * 100\%$ .

Example of a table as presented in individual studies **that does not allow** for calculation of the (dis)concordance.

| <b>Preferred</b> | N | % |
|------------------|---|---|
| Active           |   |   |
| Shared           |   |   |
| Passive          |   |   |
| <b>Perceived</b> |   |   |
| Active           |   |   |
| Shared           |   |   |
| Passive          |   |   |
