# Supplementary material for: Patients' preferred and perceived level of involvement in decision making for cancer treatment: A systematic review
Source: PubMed Central journal article supplement — Psychooncology. 2021 Jun 28;30(10):1663–79. doi: 10.1002/pon.5750 (PMC8518833; doi:10.1002/pon.5750), 2021-06-28
Supplement: PON-30-1663-s004.pdf [file PON-30-1663-s004.pdf]

## **Search**

### **PubMed**

#### *#1 – decision making*

Decision making[MeSH Terms] OR Clinical decision-making[MeSH Terms] OR decision making, shared[MeSH Terms] OR decision\*[Title/Abstract] OR choice\*[Title/Abstract]

#### *#2 – patient participation*

patient participation[MeSH Terms] OR patient preference[MeSH Terms] OR role[MeSH Terms] OR prefer\*[Title/Abstract] OR particip\*[Title/Abstract] OR role\*[Title/Abstract] OR involve\*[Title/Abstract]

#### *#3 - oncology*

oncolog\*[Title/Abstract] OR cancer\*[Title/Abstract] OR malignan\*[Title/Abstract] OR carcinoma[Title/Abstract] OR tumor[Title/Abstract] OR tumors[Title/Abstract] OR tumour[Title/Abstract] OR tumours[Title/Abstract] OR “medical oncology”[MeSH Terms] OR neoplasms[MeSH Terms]

#### *#4 - perception*

perception[MeSH Terms] OR perception\*[Title/Abstract] OR perceive\*[Title/Abstract] OR actual[Title/Abstract] OR experience\*[Title/Abstract]

#### *#5 - treatment*

“General surgery”[MeSH Terms] OR Therapy[MeSH Subheading] OR therapeutics[MeSH Terms] OR therap\*[Title/Abstract] OR treatment\*[Title/Abstract] OR “palliative care”[Title/Abstract]

Combine search terms #1-#5, used filter: Publication date from 2009/01/01 to 2020/01/01

### **PsychInfo**

#### *#1 – decision making*

exp Decision Making/ or decision\*.ab,ti. or choice\*.ab,ti.

#### *#2 – patient participation*

exp Preferences/ or exp Roles/ or prefer\*.ab,ti. or particip\*.ab,ti. or role\*.ab,ti. or involve\*.ab,ti.

#### *#3 – oncology*

exp Neoplasms/ or exp Oncology/ or oncolog\*.ab,ti. or cancer\*.ab,ti. or malignan\*.ab,ti. or carcinoma.ab,ti. or tumor.ab,ti. or tumour.ab,ti. or tumors.ab,ti. or tumours.ab,ti.

#### *#4 – perception*

exp Perception/ or perception\*.ab,ti. or perceive\*.ab,ti. or actual.ab,ti. or experience\*.ab,ti.

#### *#5 – treatment*

exp treatment/ or exp Surgery/ or exp Radiation Therapy/ or exp Radiation/ or exp Immunotherapy/ or exp Drug Therapy/ or exp Palliative Care/ or therap\*.ab,ti. or treatment\*.ab,ti. or palliative care.ab,ti.

Combine search terms #1-#5

### **Embase**

*#1 – decision making*

'decision making'/exp OR 'clinical decision making'/exp OR decision\*:ab,ti OR choice\*:ab,ti

*#2 – patient participation*

'patient participation'/exp OR 'patient preference'/exp OR prefer\*:ab,ti OR particip\*:ab,ti OR role\*:ab,ti OR involve\*:ab,ti

*#3 – oncology*

oncolog\*:ab,ti OR cancer\*:ab,ti OR malignan\*:ab,ti OR carcinoma:ab,ti OR tumor:ab,ti OR tumors:ab,ti OR tumour:ab,ti OR tumours:ab,ti OR 'neoplasm'/exp OR 'malignant neoplasm'/exp OR 'oncology'/exp OR 'carcinoma'/exp

*#4 – perception*

'perception'/exp OR perception\*:ab,ti OR perceive\*:ab,ti OR actual:ab,ti OR experience\*:ab,ti

*#5 – treatment*

'therapy'/exp OR 'surgery'/exp OR therap\*:ab,ti OR treatment\*:ab,ti OR 'palliative care':ab,ti

Combine search terms #1-#5

**CINAHL**

*#1 – decision making*

(MH "Decision Making+") OR TI ( decision# OR choice# ) OR AB ( decision# OR choice# )

*#2 – patient participation*

(MH "Patient preference+") OR (MH "Role+") OR TI ( prefer# OR particip# OR role# OR involve# ) OR AB ( prefer# OR particip# OR role# OR involve# )

*#3 – oncology*

(MH "Neoplasms+") OR (MH "oncology+") OR TI ( oncolog# OR cancer# OR malignan# OR carcinoma OR tumor OR tumour OR tumors OR tumours ) OR AB ( oncolog# OR cancer# OR malignan# OR carcinoma OR tumor OR tumour OR tumors OR tumours )

*#4 – perception*

(MH "Perception+") OR TI ( perception# OR perceive# OR actual OR experience# ) OR AB ( perception# OR perceive# OR actual OR experience# )

*#5 – treatment*

(MH "Surgery, Operative+") OR (MH "therapeutics+") OR TI ( therap# OR treatment# OR palliative care ) OR AB ( therap# OR treatment# OR palliative care )

Combine search terms #1-#5
